# Supplementary material for: Silane Modification of Mesoporous Materials for the Optimization of Antiviral Drug Adsorption and Release Capabilities in Vaginal Media
Source: MDPI journal article supplement (doi:10.3390/pharmaceutics13091416), 2021-09-07
Supplement: s1 [file s1]

# Supplementary Material: Silane Modification of Mesoporous Materials for the Optimization of Antiviral Drug Adsorption and Releasing Capabilities in Vaginal Media

Elena Whittle, Araceli Martín-Illana, Raul Cazorla-Luna, Fernando Notario-Perez, María Dolores Veiga-Ochoa, Juan Rubio, Aitana Tamayo

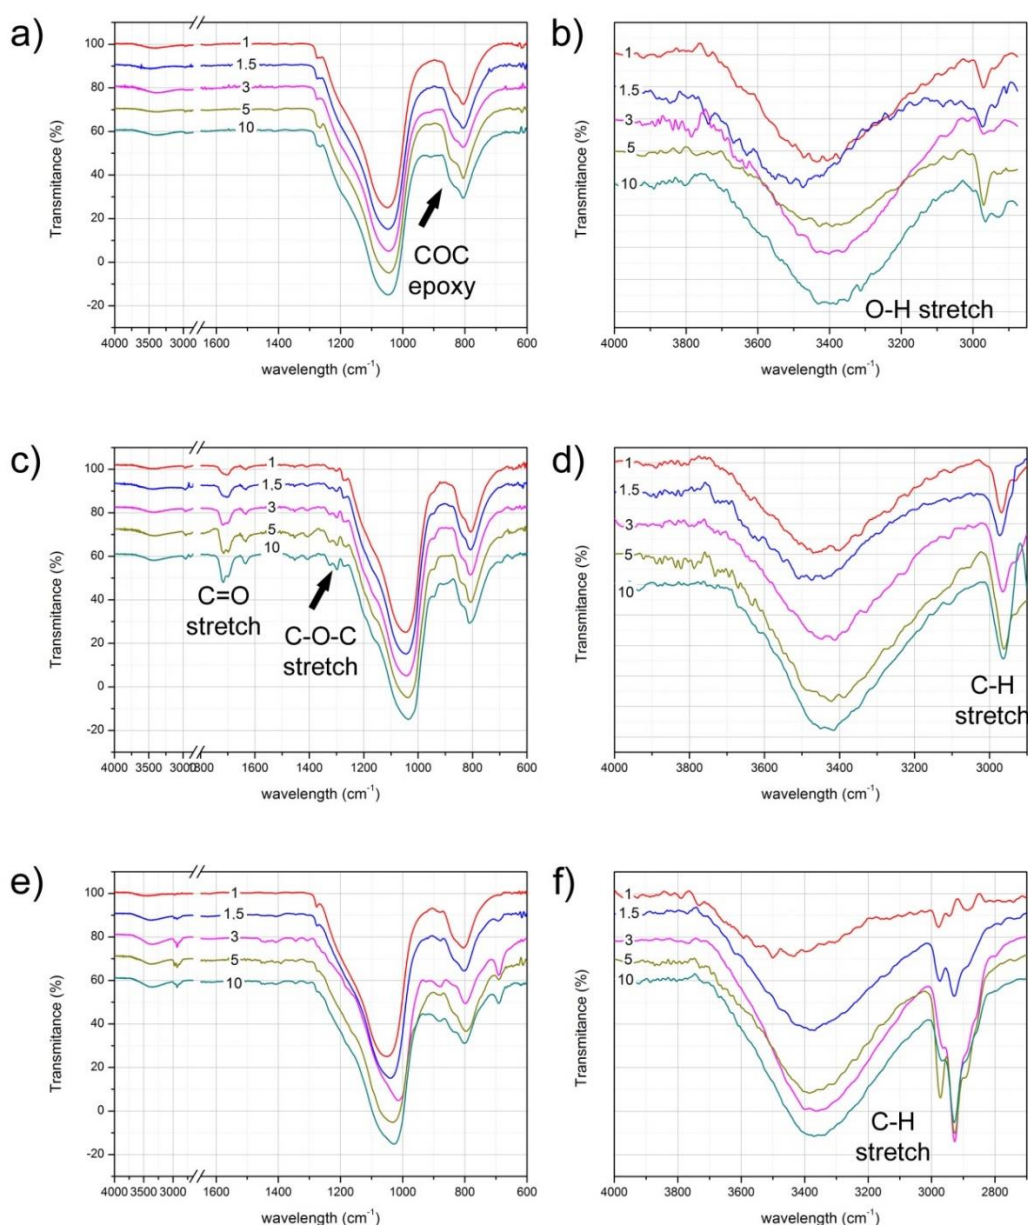

**Figure S1.** FTIR spectrum of the functionalized mesoporous hybrids **a)** and **b)** Spectra of the materials functionalized with GLYMO (**b** is a detail of the high-frequency range) **c)** and **d)** Spectra of the materials functionalized with MEMO (**d** is a detail of the high-frequency range) **e)** and **f)** Spectra of the materials functionalized with MPTMS (**f** is a detail of the high-frequency range).

**Table S1.** Table summarizing the fitting constants of the adsorption curves by the application of the Lagergren Model.

| <i>Lagergren model</i> |     |                                           |                           |                      |                      |                       |
|------------------------|-----|-------------------------------------------|---------------------------|----------------------|----------------------|-----------------------|
|                        |     | <b>k<sub>lag</sub> (min<sup>-1</sup>)</b> | <b>C<sub>∞</sub> (mg)</b> | <b>r<sup>2</sup></b> | <b>χ<sup>2</sup></b> | <b>Prob &gt; F</b>    |
| Non functionalized     |     | 7.245×10 <sup>-2</sup>                    | 11.1                      | 0.880                | 2.6                  | 7.28×10 <sup>-7</sup> |
| G                      | 1   | 1.211×10 <sup>-2</sup>                    | 72.7                      | 0.865                | 111.6                | 3.22×10 <sup>-5</sup> |
|                        | 1.5 | 6.261×10 <sup>-2</sup>                    | 64.6                      | 0.887                | 75.1                 | 2.50×10 <sup>-6</sup> |
|                        | 3   | 7.910×10 <sup>-3</sup>                    | 85.9                      | 0.953                | 44.4                 | 5.58×10 <sup>-7</sup> |
|                        | 5   | 9.380×10 <sup>-3</sup>                    | 77.6                      | 0.886                | 104.4                | 2.30×10 <sup>-5</sup> |
|                        | 10  | 1.425×10 <sup>-1</sup>                    | 15.3                      | 0.699                | 11.0                 | 4.71×10 <sup>-5</sup> |
| M                      | 1   | 6.290×10 <sup>-3</sup>                    | 52.4                      | 0.863                | 44.0                 | 3.28×10 <sup>-5</sup> |
|                        | 1.5 | 4.700×10 <sup>-3</sup>                    | 37.4                      | 0.894                | 16.0                 | 1.61×10 <sup>-5</sup> |
|                        | 3   | 3.504×10 <sup>-2</sup>                    | 47.8                      | 0.967                | 13.5                 | 6.03×10 <sup>-8</sup> |
|                        | 5   | 1.301×10 <sup>-1</sup>                    | 32.6                      | 0.462                | 96.1                 | 4.74×10 <sup>-4</sup> |
|                        | 10  | 3.440×10 <sup>-3</sup>                    | 84.6                      | 0.969                | 23.4                 | 2.46×10 <sup>-7</sup> |
| S                      | 1   | 1.135×10 <sup>-2</sup>                    | 37.2                      | 0.672                | 50.3                 | 2.39×10 <sup>-4</sup> |
|                        | 1.5 | 1.796×10 <sup>-1</sup>                    | 34.1                      | 0.676                | 39.2                 | 1.19×10 <sup>-5</sup> |
|                        | 3   | 1.639×10 <sup>-2</sup>                    | 85.9                      | 0.888                | 130.3                | 1.08×10 <sup>-5</sup> |
|                        | 5   | 1.323×10 <sup>-2</sup>                    | 37.8                      | 0.841                | 37.1                 | 5.94×10 <sup>-5</sup> |
|                        | 10  | 1.323×10 <sup>-2</sup>                    | 53.6                      | 0.841                | 74.4                 | 5.94×10 <sup>-5</sup> |

**Table S2.** Table summarizing the fitting constants of the adsorption curves by the application of the Pseudo second Model.

| <i>Pseudo-second order model</i> |     |                                          |                           |                      |                      |                       |
|----------------------------------|-----|------------------------------------------|---------------------------|----------------------|----------------------|-----------------------|
|                                  |     | <b>k<sub>2s</sub> (min<sup>-1</sup>)</b> | <b>C<sub>∞</sub> (mg)</b> | <b>r<sup>2</sup></b> | <b>χ<sup>2</sup></b> | <b>Prob &gt; F</b>    |
| Non functionalized               |     | 7.840×10 <sup>-3</sup>                   | 12.0                      | 0.931                | 1.50                 | 6.40×10 <sup>-8</sup> |
| G                                | 1   | 1.425×10 <sup>-1</sup>                   | 15.3                      | 0.699                | 11.00                | 4.71×10 <sup>-5</sup> |
|                                  | 1.5 | 1.700×10 <sup>-4</sup>                   | 82.9                      | 0.924                | 62.62                | 3.43×10 <sup>-6</sup> |
|                                  | 3   | 1.180×10 <sup>-3</sup>                   | 69.9                      | 0.895                | 70.33                | 1.94×10 <sup>-6</sup> |
|                                  | 5   | 1.011×10 <sup>-4</sup>                   | 96.1                      | 0.952                | 45.68                | 6.27×10 <sup>-7</sup> |
|                                  | 10  | 1.200×10 <sup>-4</sup>                   | 89.2                      | 0.938                | 56.83                | 2.17×10 <sup>-6</sup> |
| M                                | 1   | 1.373×10 <sup>-4</sup>                   | 58.9                      | 0.914                | 27.54                | 5.37×10 <sup>-6</sup> |
|                                  | 1.5 | 1.504×10 <sup>-4</sup>                   | 41.7                      | 0.932                | 10.29                | 2.86×10 <sup>-6</sup> |
|                                  | 3   | 9.591×10 <sup>-4</sup>                   | 51.5                      | 0.963                | 14.86                | 8.83×10 <sup>-8</sup> |
|                                  | 5   | 3.130×10 <sup>-3</sup>                   | 37.0                      | 0.600                | 71.46                | 1.57×10 <sup>-4</sup> |
|                                  | 10  | 3.650×10 <sup>-5</sup>                   | 100.6                     | 0.977                | 17.38                | 7.64×10 <sup>-8</sup> |
| S                                | 1   | 4.766×10 <sup>-4</sup>                   | 39.5                      | 0.759                | 36.96                | 7.47×10 <sup>-5</sup> |
|                                  | 1.5 | 9.590×10 <sup>-3</sup>                   | 35.1                      | 0.779                | 26.78                | 2.69×10 <sup>-6</sup> |
|                                  | 3   | 2.234×10 <sup>-4</sup>                   | 62.3                      | 0.896                | 48.48                | 1.15×10 <sup>-5</sup> |
|                                  | 5   | 3.160×10 <sup>-4</sup>                   | 44.0                      | 0.896                | 24.17                | 1.15×10 <sup>-5</sup> |
|                                  | 10  | 2.051×10 <sup>-4</sup>                   | 96.4                      | 0.930                | 81.83                | 1.76×10 <sup>-6</sup> |

**Table S3.** Table summarizing the fitting constants of the adsorption curves by the application of the Pseudo second Model.

| <i>Elovich model</i> |     |          |          |                      |                      |                       |
|----------------------|-----|----------|----------|----------------------|----------------------|-----------------------|
|                      |     | <b>a</b> | <b>b</b> | <b>r<sup>2</sup></b> | <b>χ<sup>2</sup></b> | <b>Prob &gt; F</b>    |
| Non functionalized   |     | 4.54     | 0.59     | 0.957                | 0.93                 | 7.64×10 <sup>-9</sup> |
| G                    | 1   | 7.61     | 0.09     | 0.937                | 52.00                | 1.66×10 <sup>-6</sup> |
|                      | 1.5 | 33.08    | 0.11     | 0.835                | 110.32               | 1.12×10 <sup>-5</sup> |
|                      | 3   | 6.39     | 0.08     | 0.846                | 145.87               | 5.71×10 <sup>-5</sup> |
|                      | 5   | 6.21     | 0.08     | 0.943                | 51.98                | 1.53×10 <sup>-6</sup> |
|                      | 10  | 14.71    | 0.45     | 0.963                | 1.34                 | 1.21×10 <sup>-8</sup> |
| M                    | 1   | 4.23     | 0.14     | 0.895                | 33.77                | 1.19×10 <sup>-5</sup> |
|                      | 1.5 | 2.78     | 0.21     | 0.876                | 18.78                | 2.96×10 <sup>-5</sup> |
|                      | 3   | 9.77     | 0.13     | 0.904                | 39.08                | 3.98×10 <sup>-6</sup> |
|                      | 5   | 23.80    | 0.20     | 0.859                | 25.19                | 2.85×10 <sup>-6</sup> |
|                      | 10  | 4.00     | 0.10     | 0.790                | 160.26               | 4.15×10 <sup>-4</sup> |
| S                    | 1   | 19.23    | 0.25     | 0.847                | 23.51                | 1.32×10 <sup>-5</sup> |
|                      | 1.5 | 337.12   | 0.29     | 0.795                | 24.79                | 1.99×10 <sup>-6</sup> |
|                      | 3   | 24.16    | 0.09     | 0.827                | 200.99               | 5.72×10 <sup>-5</sup> |
|                      | 5   | 8.42     | 0.21     | 0.801                | 46.36                | 1.38×10 <sup>-4</sup> |
|                      | 10  | 11.92    | 0.15     | 0.801                | 92.98                | 1.38×10 <sup>-4</sup> |

**Table S4.** Table summarizing the kinetical data obtained through the application of the first order model.

| <i>First order model</i> |     |               |                                           |                      |                       |                       |
|--------------------------|-----|---------------|-------------------------------------------|----------------------|-----------------------|-----------------------|
|                          |     | <b>C (mg)</b> | <b>k<sub>1st</sub> (min<sup>-1</sup>)</b> | <b>r<sup>2</sup></b> | <b>χ<sup>2</sup></b>  | <b>Prob &gt; F</b>    |
| Non functionalized       |     | 0.98          | 5.201×10 <sup>-02</sup>                   | 0.990                | 1.40×10 <sup>-3</sup> | 5.61×10 <sup>-8</sup> |
| G                        | 1   | 1.78          | 9.264×10 <sup>-2</sup>                    | 0.981                | 8.82×10 <sup>-3</sup> | 1.87×10 <sup>-7</sup> |
|                          | 1.5 | 0.15          | 5.268×10 <sup>-2</sup>                    | 0.963                | 1.13×10 <sup>-4</sup> | 2.16×10 <sup>-6</sup> |
|                          | 3   | 0.63          | 7.258×10 <sup>-2</sup>                    | 0.976                | 1.38×10 <sup>-3</sup> | 4.86×10 <sup>-7</sup> |
|                          | 5   | 2.57          | 8.145×10 <sup>-2</sup>                    | 0.975                | 2.36×10 <sup>-2</sup> | 4.59×10 <sup>-7</sup> |
|                          | 10  | 0.15          | 5.341×10 <sup>-2</sup>                    | 0.982                | 5.81×10 <sup>-5</sup> | 2.95×10 <sup>-7</sup> |
| M                        | 1   | 0.31          | 8.069×10 <sup>-2</sup>                    | 0.987                | 1.82×10 <sup>-4</sup> | 6.90×10 <sup>-8</sup> |
|                          | 1.5 | 0.42          | 4.724×10 <sup>-2</sup>                    | 0.987                | 3.23×10 <sup>-4</sup> | 1.32×10 <sup>-7</sup> |
|                          | 3   | 1.09          | 8.648×10 <sup>-2</sup>                    | 0.967                | 5.65×10 <sup>-3</sup> | 9.93×10 <sup>-7</sup> |
|                          | 5   | 0.45          | 7.256×10 <sup>-2</sup>                    | 0.975                | 7.45×10 <sup>-4</sup> | 5.65×10 <sup>-7</sup> |
|                          | 10  | 0.24          | 4.328×10 <sup>-2</sup>                    | 0.978                | 1.73×10 <sup>-4</sup> | 7.22×10 <sup>-7</sup> |
| S                        | 1   | 0.76          | 7.824×10 <sup>-2</sup>                    | 0.970                | 2.51×10 <sup>-3</sup> | 8.59×10 <sup>-7</sup> |
|                          | 1.5 | 2.15          | 5.667×10 <sup>-2</sup>                    | 0.960                | 2.55×10 <sup>-2</sup> | 2.67×10 <sup>-6</sup> |
|                          | 3   | 0.52          | 5.152×10 <sup>-2</sup>                    | 0.980                | 7.96×10 <sup>-4</sup> | 4.93×10 <sup>-7</sup> |
|                          | 5   | 0.45          | 5.590×10 <sup>-2</sup>                    | 0.971                | 8.47×10 <sup>-4</sup> | 1.16×10 <sup>-6</sup> |
|                          | 10  | 0.90          | 6.887×10 <sup>-2</sup>                    | 0.966                | 3.96×10 <sup>-3</sup> | 1.43×10 <sup>-6</sup> |

**Table S5.** Table summarizing the kinetical data obtained through the application of the Korsmeyer-Peppas model.

| Korsmeyer – Peppas model |        |                                      |                        |                |                |                       |                        |
|--------------------------|--------|--------------------------------------|------------------------|----------------|----------------|-----------------------|------------------------|
|                          | C (mg) | K <sub>KP</sub> (min <sup>-1</sup> ) | n                      | r <sup>2</sup> | χ <sup>2</sup> | Prob > F              |                        |
| Non functionalized       |        | 1.85                                 | 9.254×10 <sup>-2</sup> | 0.39           | 0.941          | 8.57×10 <sup>-3</sup> | 6.80×10 <sup>-5</sup>  |
| G                        | 1      | 3.30                                 | 1.649×10 <sup>-1</sup> | 0.28           | 0.921          | 3.66×10 <sup>-2</sup> | 7.014×10 <sup>-5</sup> |
|                          | 1.5    | 0.30                                 | 9.915×10 <sup>-2</sup> | 0.36           | 0.982          | 5.50×10 <sup>-5</sup> | 2.611×10 <sup>-6</sup> |
|                          | 3      | 1.04                                 | 1.492×10 <sup>-1</sup> | 0.32           | 0.953          | 2.72×10 <sup>-3</sup> | 2.406×10 <sup>-5</sup> |
|                          | 5      | 4.60                                 | 1.535×10 <sup>-1</sup> | 0.30           | 0.948          | 4.98×10 <sup>-2</sup> | 2.745×10 <sup>-5</sup> |
|                          | 10     | 0.24                                 | 1.181×10 <sup>-1</sup> | 0.38           | 0.961          | 1.29×10 <sup>-4</sup> | 2.162×10 <sup>-5</sup> |
| M                        | 1      | 0.50                                 | 1.670×10 <sup>-1</sup> | 0.30           | 0.925          | 1.07×10 <sup>-3</sup> | 7.31×10 <sup>-5</sup>  |
|                          | 1.5    | 0.83                                 | 8.298×10 <sup>-2</sup> | 0.40           | 0.961          | 9.80×10 <sup>-4</sup> | 2.40×10 <sup>-5</sup>  |
|                          | 3      | 2.74                                 | 1.142×10 <sup>-1</sup> | 0.29           | 0.959          | 7.05×10 <sup>-3</sup> | 1.41×10 <sup>-5</sup>  |
|                          | 5      | 1.05                                 | 1.051×10 <sup>-1</sup> | 0.32           | 0.956          | 1.32×10 <sup>-3</sup> | 2.12×10 <sup>-5</sup>  |
|                          | 10     | 0.47                                 | 7.755×10 <sup>-2</sup> | 0.41           | 0.979          | 1.63×10 <sup>-4</sup> | 5.38×10 <sup>-6</sup>  |
| S                        | 1      | 1.80                                 | 1.126×10 <sup>-1</sup> | 0.30           | 0.958          | 3.49×10 <sup>-3</sup> | 1.63×10 <sup>-5</sup>  |
|                          | 1.5    | 4.23                                 | 1.058×10 <sup>-1</sup> | 0.35           | 0.944          | 3.57×10 <sup>-2</sup> | 4.29×10 <sup>-5</sup>  |
|                          | 3      | 0.94                                 | 9.444×10 <sup>-2</sup> | 0.39           | 0.956          | 1.77×10 <sup>-3</sup> | 3.33×10 <sup>-5</sup>  |
|                          | 5      | 0.73                                 | 1.215×10 <sup>-1</sup> | 0.37           | 0.972          | 8.18×10 <sup>-4</sup> | 8.48×10 <sup>-6</sup>  |
|                          | 10     | 1.14                                 | 1.897×10 <sup>-1</sup> | 0.33           | 0.967          | 3.78×10 <sup>-3</sup> | 9.90×10 <sup>-6</sup>  |

**Table S6.** Table summarizing the kinetical data obtained through the application of the Weibull model.

| Weibull model      |        |      |      |                |                |                       |                       |
|--------------------|--------|------|------|----------------|----------------|-----------------------|-----------------------|
|                    | C (mg) | b    | a    | r <sup>2</sup> | χ <sup>2</sup> | Prob > F              |                       |
| Non functionalized |        | 1.03 | 0.83 | 13.30          | 0.994          | 8.85×10 <sup>-4</sup> | 2.37×10 <sup>-7</sup> |
| G                  | 1      | 1.86 | 0.72 | 6.14           | 0.992          | 3.57×10 <sup>-3</sup> | 2.11×10 <sup>-7</sup> |
|                    | 1.5    | 0.19 | 0.59 | 8.73           | 0.997          | 9.52×10 <sup>-6</sup> | 3.27×10 <sup>-8</sup> |
|                    | 3      | 0.69 | 0.67 | 7.20           | 0.995          | 3.12×10 <sup>-4</sup> | 1.09×10 <sup>-7</sup> |
|                    | 5      | 2.78 | 0.66 | 6.30           | 0.995          | 4.34×10 <sup>-3</sup> | 6.25×10 <sup>-8</sup> |
|                    | 10     | 0.17 | 0.73 | 10.54          | 0.995          | 1.54×10 <sup>-5</sup> | 1.08×10 <sup>-7</sup> |
| M                  | 1      | 0.32 | 0.77 | 7.61           | 0.995          | 7.56×10 <sup>-5</sup> | 9.84×10 <sup>-8</sup> |
|                    | 1.5    | 0.46 | 0.77 | 12.71          | 0.996          | 9.71×10 <sup>-5</sup> | 7.50×10 <sup>-8</sup> |
|                    | 3      | 1.21 | 0.61 | 5.57           | 0.998          | 3.97×10 <sup>-4</sup> | 1.07×10 <sup>-8</sup> |
|                    | 5      | 0.50 | 0.66 | 7.16           | 0.995          | 1.46×10 <sup>-4</sup> | 8.62×10 <sup>-8</sup> |
|                    | 10     | 0.28 | 0.68 | 12.19          | 0.997          | 2.52×10 <sup>-5</sup> | 5.08×10 <sup>-8</sup> |
| S                  | 1      | 0.84 | 0.63 | 6.24           | 0.995          | 3.76×10 <sup>-4</sup> | 6.31×10 <sup>-8</sup> |
|                    | 1.5    | 2.39 | 0.68 | 9.01           | 0.971          | 1.83×10 <sup>-2</sup> | 8.13×10 <sup>-6</sup> |
|                    | 3      | 0.57 | 0.74 | 11.41          | 0.991          | 3.66×10 <sup>-4</sup> | 6.52×10 <sup>-7</sup> |
|                    | 5      | 0.53 | 0.65 | 8.99           | 0.995          | 1.35×10 <sup>-4</sup> | 9.47×10 <sup>-8</sup> |
|                    | 10     | 1.04 | 0.61 | 6.94           | 0.995          | 6.26×10 <sup>-4</sup> | 1.11×10 <sup>-7</sup> |
